# Supplementary material for: Genome wide in silico analysis of Plasmodium falciparum phosphatome
Source: PubMed Central journal article supplement (PMC4256932; doi:10.1186/1471-2164-15-1024), 2014-11-25
Supplement: 12864_2014_6717_MOESM3_ESM.pdf [file 12864_2014_6717_MOESM3_ESM.pdf]

## MPP Superfamily

PF3D7\_0107800

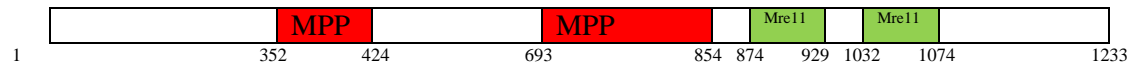

PF3D7\_0314400

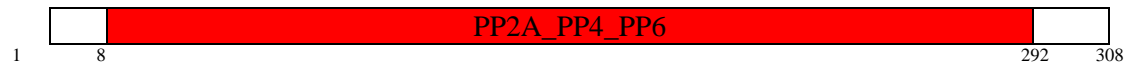

PF3D7\_0802800

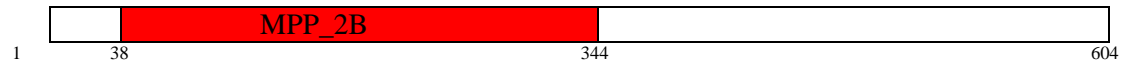

PF3D7\_0912400

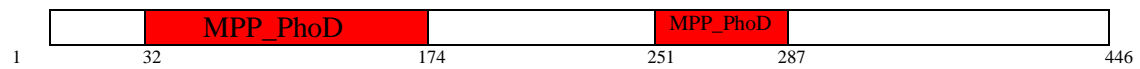

PF3D7\_0918000

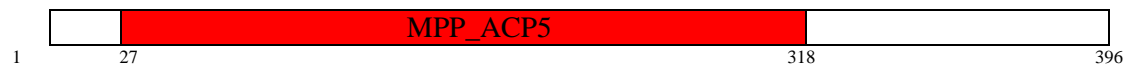

PF3D7\_0925400

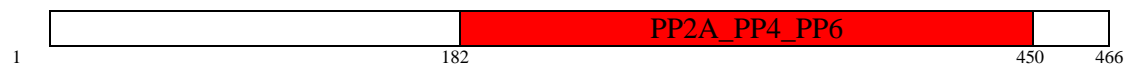

PF3D7\_0927700

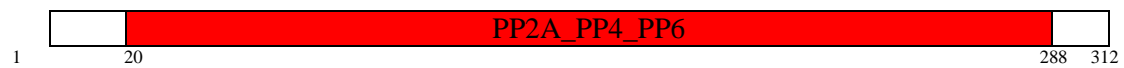

PF3D7\_1018200

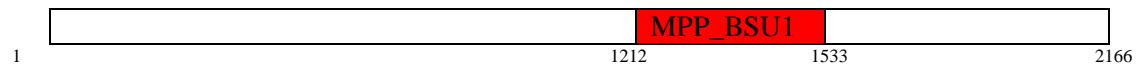

PF3D7\_1206000

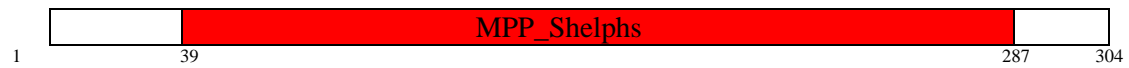

PF3D7\_1340600

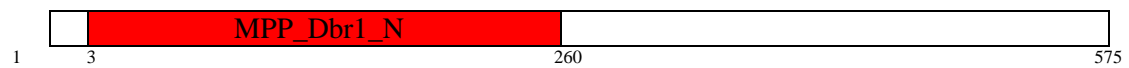

PF3D7\_1355500

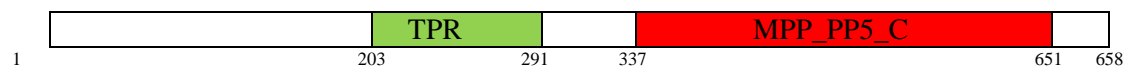

PF3D7\_1403900

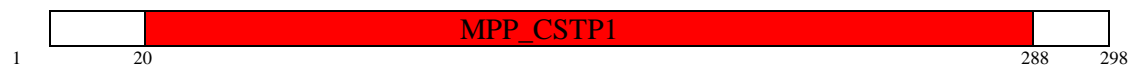

PF3D7\_1406700

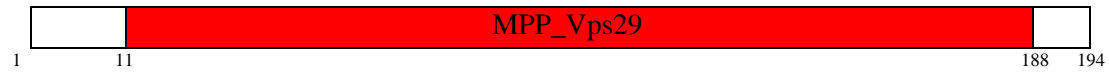

PF3D7\_1414400

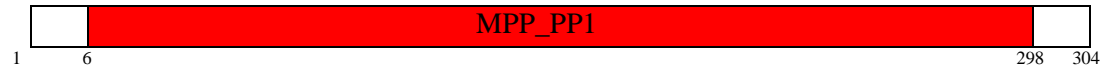

PF3D7\_1423300

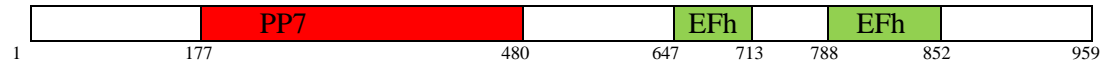

PF3D7\_1464600

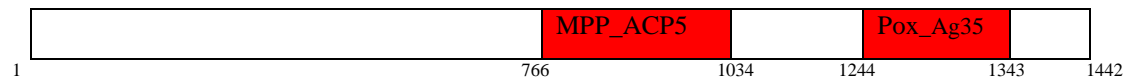

PF3D7\_1466100

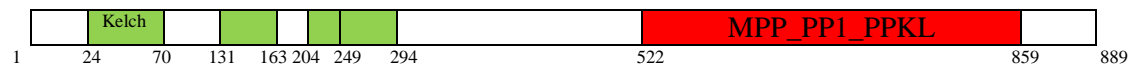

PF3D7\_1469200

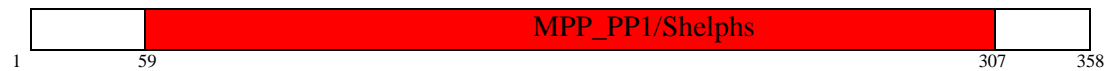

EEP\_Superfamily

PF3D7\_0107200

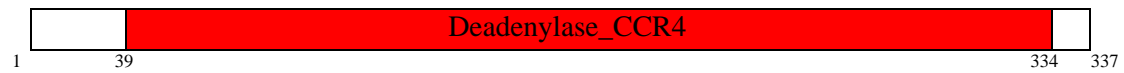

PF3D7\_0319200

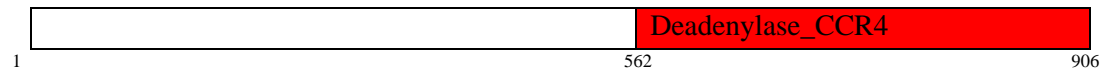

PF3D7\_0705500

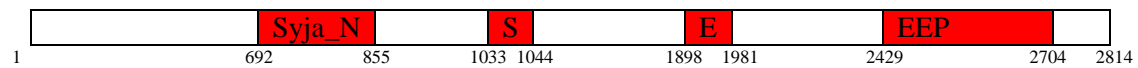

PF3D7\_0305600

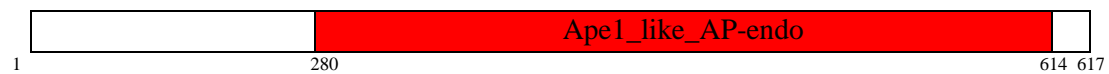

PF3D7\_1111600

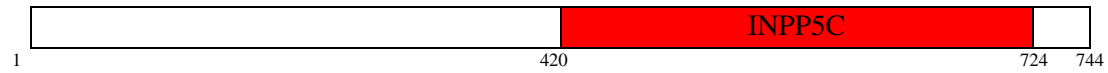

PF3D7\_1238600

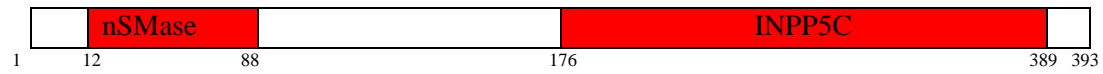

PF3D7\_1430600

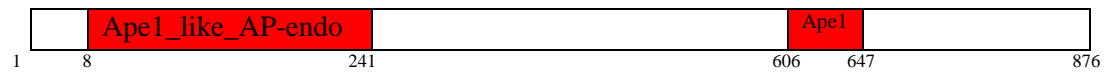

PF3D7\_1363500

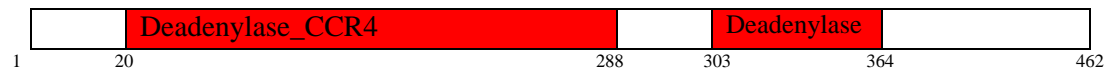

PP2Cc\_superfamily

PF3D7\_0410300

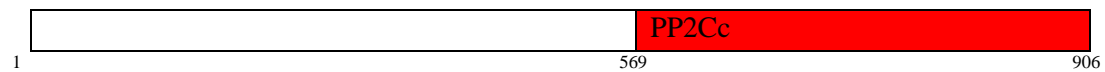

PF3D7\_0520100

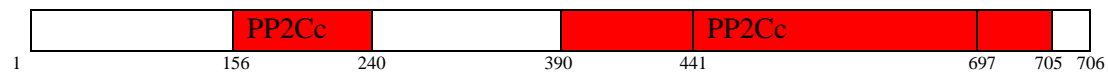

PF3D7\_0810300

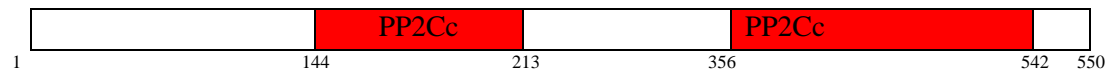

PF3D7\_0810500

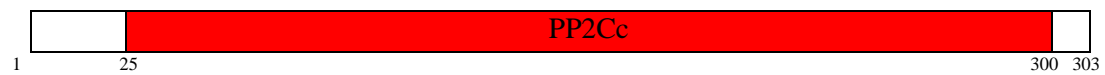

PF3D7\_1009600

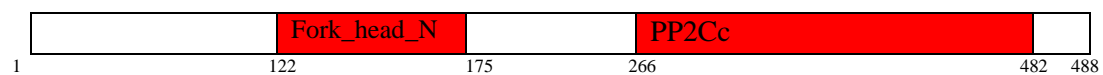

PF3D7\_1135100

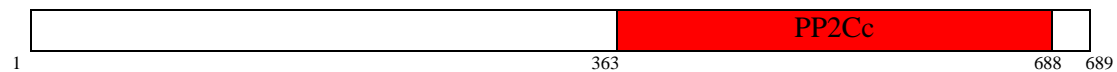

PF3D7\_1208900

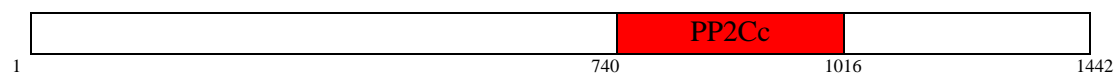

PF3D7\_1249300

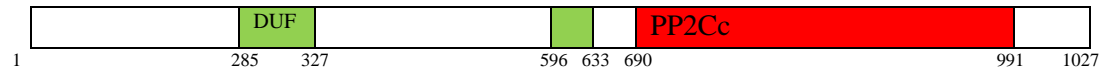

PF3D7\_1309200

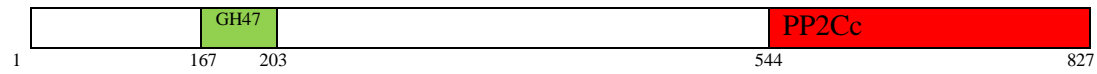

PF3D7\_1138500

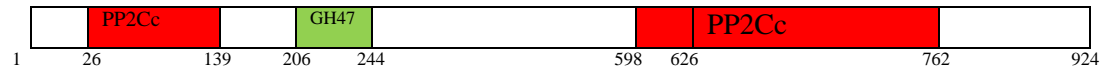

PF3D7\_1455000

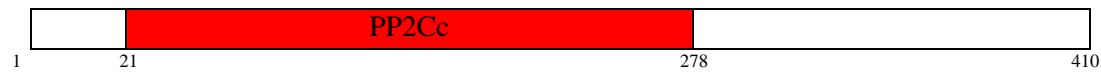

HAD\_Superfamily

PF3D7\_0303200

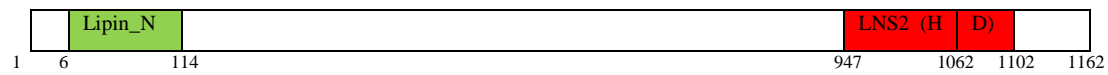

PF3D7\_0515900

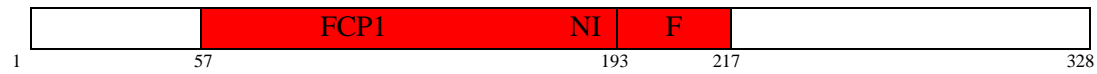

PF3D7\_0715000

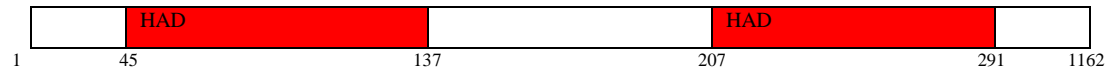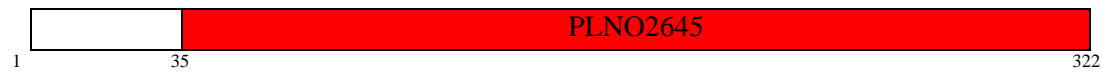

PF3D7\_0726900

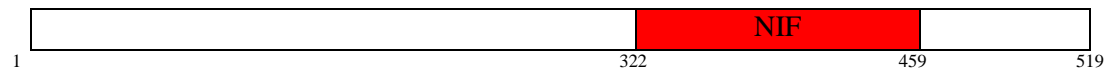

PF3D7\_0817400

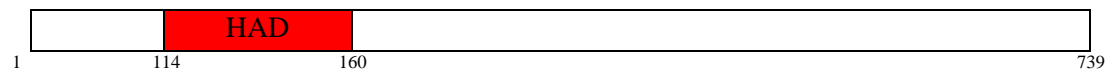

PF3D7\_1012700

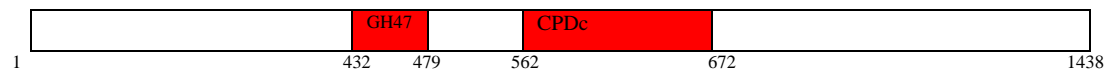

PF3D7\_1118400

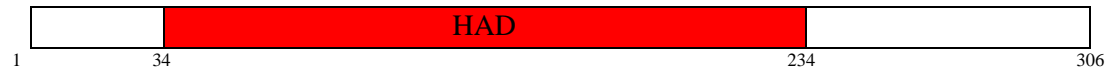

PF3D7\_1226100

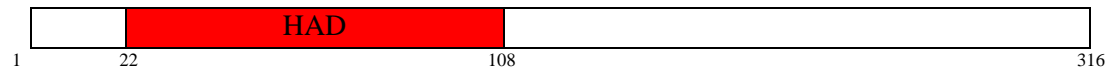

PF3D7\_1355700

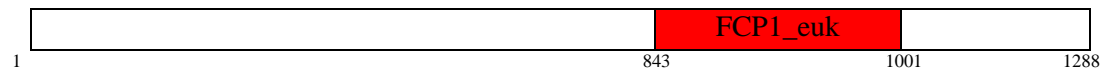

PF3D7\_1363200

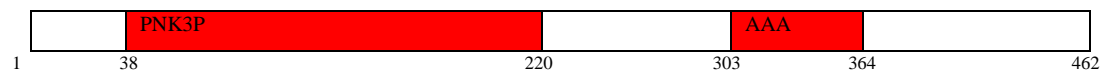

HP\_Superfamily

PF3D7\_0208400

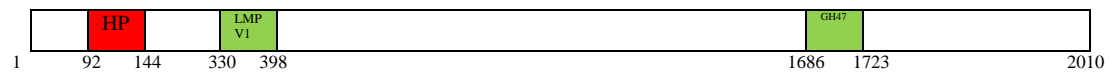

PF3D7\_0310300

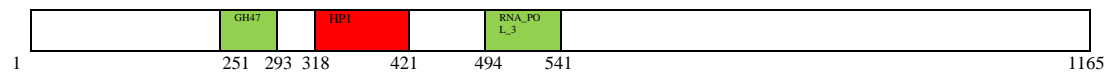

PF3D7\_0413500

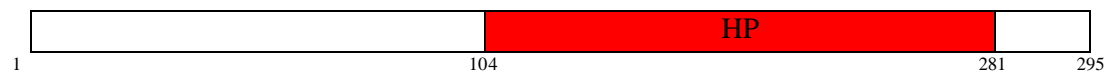

PF3D7\_1120100

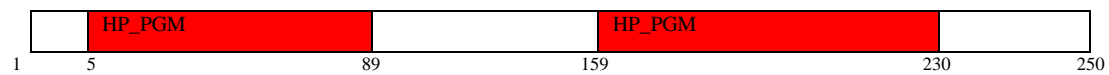

PF3D7\_1430300

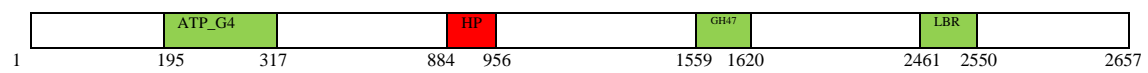

SYJA\_N\_SUPERFAMILY

PF3D7\_0705500

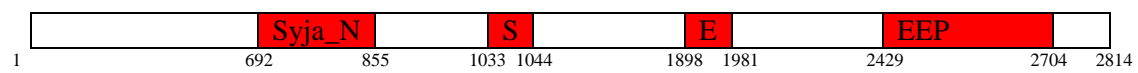

PF3D7\_0802500

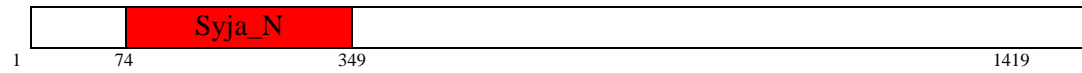

PF3D7\_1354200

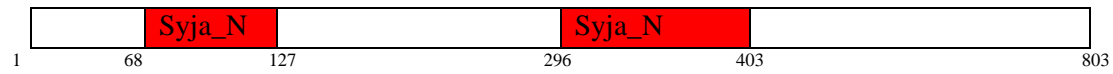

RHOD\_SUPERFAMILY

PF3D7\_1206400

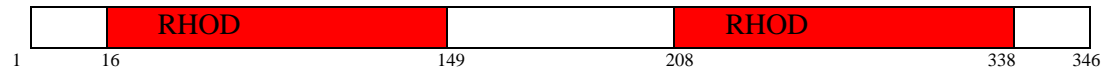

PF3D7\_1305500

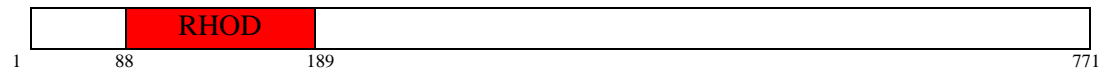

PTPc\_Superfamily

PF3D7\_0309000

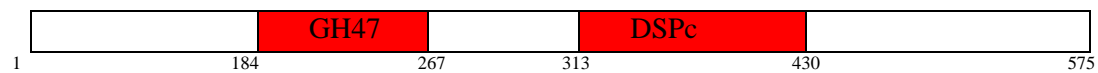

PF3D7\_1127000

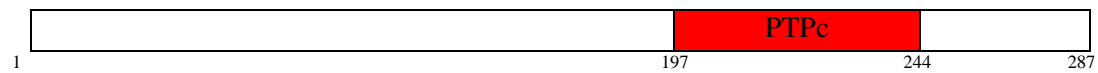

PF3D7\_11131000

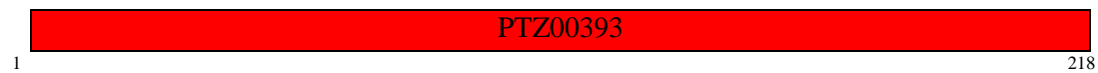

PF3D7\_1455100

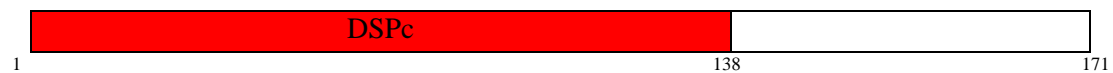

PTPLA\_Superfamily

PF3D7\_1331000

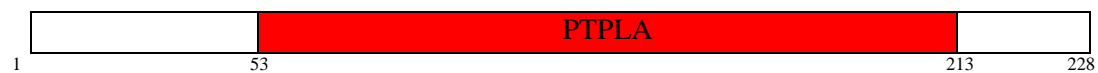

## PTH2\_Superfamily

PF3D7\_0610500

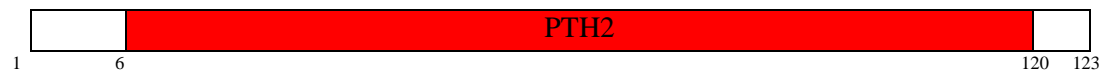

## PAP2\_C Superfamily

PF3D7\_0610500.1

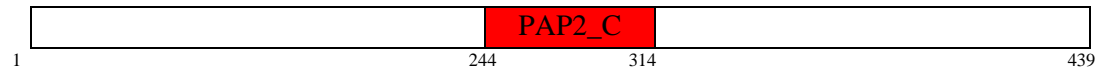

PF3D7\_0610500.2

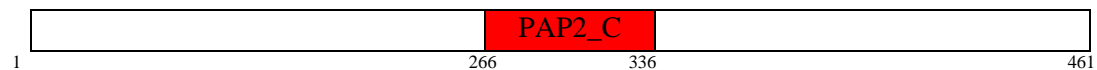

PF3D7\_0805600

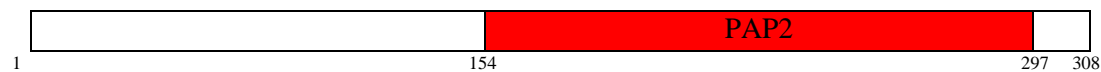

## Nucleoside Phosphatase Superfamily

PF3D7\_1322000

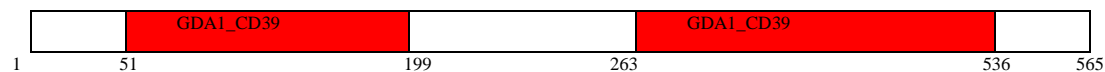

PF3D7\_1431800

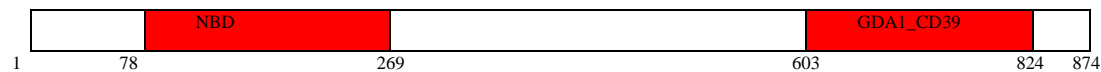

## CYTH Superfamily

PF3D7\_0322100

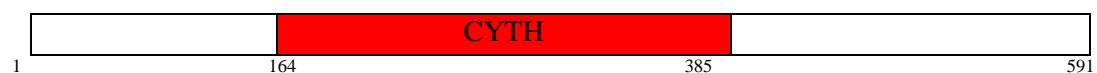

## ABBREVIATION

MPP – Metallophosphatase, PTP – Protein Tyrosine Phosphatase, PP2Cc – Protein Phosphatase 2 c, HP – Histidine Phosphatase, HAD – Haloacid Dehalogenase, PAP – Phosphatidic Acid Phosphatase, EEP – Exonuclease-Endonuclease Phosphatase, ND – Nucleoside Phosphatase, PTH – Peptidyl-tRNA hydrolase, CYTH-like\_pase – Triphosphate Tunnel Metaloenzyme Phosphatase, RHOD – Rhodanese Homology Domain, PTPLA – Protein Tyrosine phosphatase like protein, Syja\_N – SacL Homology Domain, Mre 11 – Mre 11 nuclease, TPR - Tetratricopeptide Repeat Domain, PP – Protein Phosphatase, EFh – Efh hand calcium binding motif, Pox-Ag35 – Pox virus Ag35 surface protein, CCR – Carbon Catabolite Repressor protein, INPP5C - Inositol Polyphosphate 5-Phosphatases, PLN002645 – Protein Phosphatase 2c, NIF – NLI like Interacting Phosphatase, CPDc – Catalytic domain of ctd like phosphatase, AAA – ATPase associated cellular activities, PNK3P – Polynucleotide kinase 3 Phosphatase, LMP1 – Latent Membrane Protein 1,

RNA\_pol\_3 – DNA directed RNA Polymerase III subunit RPC 31, HP\_PGM – Histidine Phosphatase Phosphoglycerate Mutase,

LBR – Ice binding protein left handed beta roll, ATP\_G4 – ATP Grasp Domain, S – Suya\_N , E – EEP, DSPc – Dual specific Phosphatases,

PTZ00393 – Protein Tyrosine Phosphatase, GDA\_CD39 – Nucleoside Phosphatase, NBD - NBD Sugar Kinase HSP70 actin,

nSMase – sphingomyelinases, Ape1\_like\_AP-endo - Apurinic/Apyrimidinic (AP) Endonucleases, GH47 - Glycosyl hydrolase Family 47
