# Supplementary material for: Genome wide in silico analysis of Plasmodium falciparum phosphatome
Source: PubMed Central journal article supplement (PMC4256932; doi:10.1186/1471-2164-15-1024), 2014-11-25
Supplement: 12864_2014_6717_MOESM4_ESM.pdf [file 12864_2014_6717_MOESM4_ESM.pdf]

```

                250
                .....|.....
seqsig_44cb9be7fec22f1573a259a96417f992 274 TGISKWKYGVINVV 287
Cdd:cd07425                195 VGMSKGVYGGPLEV 208

```

**PF3D7\_1430600 (AP\_EEP, AP\_EEP)**

**Cd Length: 309 Bit Score: 100.47 E-value: 4.61e-23**

```

                10      20      30      40      50      60      70      80
seqsig_54ebe5c5b0ecae34017419b1778c7528  8 SWNVNGWK--KSCEIIKRNDdLVQFLKKLDIDILCLQETKTNESVIENDCNLLEAdsmnyESYWTCCKKKkgdkthKGY 85
Cdd:cd09088                4 TWNVNGIRtrLQYQPWNKENS-LKSPLDSDLADIICLQETKLTREDELDEPSAIVEG----YDSFFSFRGR-----KGY 72
                90      100     110     120     130     140     150     160
seqsig_54ebe5c5b0ecae34017419b1778c7528 86 SGLATYVRnenkiiCSTNNVfddfsffndyIKKEDLLikkkSEIDKTSISFFLLNDNKKIYNDQNIKCDKNDENhkkkn 165
Cdd:cd09088                73 SGVATYCR-----DSAATP-----VAAEGL---TGVLSPPNQKNELSENDDIGCYGEMLEFTDSK-----125
                170     180     190     200     210     220     230     240
seqsig_54ebe5c5b0ecae34017419b1778c7528 166 ktniSVSEFFNEGRILTMHKHPIVNIYAPY-SGHNYERLYYKVRFFHAVRAKIIQLrIVTGLPIILLGDFNISYRNKD 244
Cdd:cd09088                126 ---ELLELDSEGRCVLTDHGTFVLINVCPRaDPEKEERLEFKLDFYRLLEERVEAL-LKAGRVRVILGVDVNVSHRPID 200
                250
                .....|.....
seqsig_54ebe5c5b0ecae34017419b1778c7528 245 IYYLNNIINLDILLKNIH 262
Cdd:cd09088                201 HCDPDDSEDFGGESFEDN 218

```

**Cd Length: 309 Bit Score: 56.56 E-value: 1.03e-08**

```

                10      20      30      40
seqsig_54ebe5c5b0ecae34017419b1778c7528 606 DNMIDTFSFFHPNVNGKFTCWDTYRQCRVHNEGSRIDYIFMD 647
Cdd:cd09088                240 GLLIDSFRYFHPTRKGAYTCWNLTIGARPTNYGTRIDYILAD 281

```
