# Supplementary material for: Genome wide in silico analysis of Plasmodium falciparum phosphatome
Source: PubMed Central journal article supplement (PMC4256932; doi:10.1186/1471-2164-15-1024), 2014-11-25

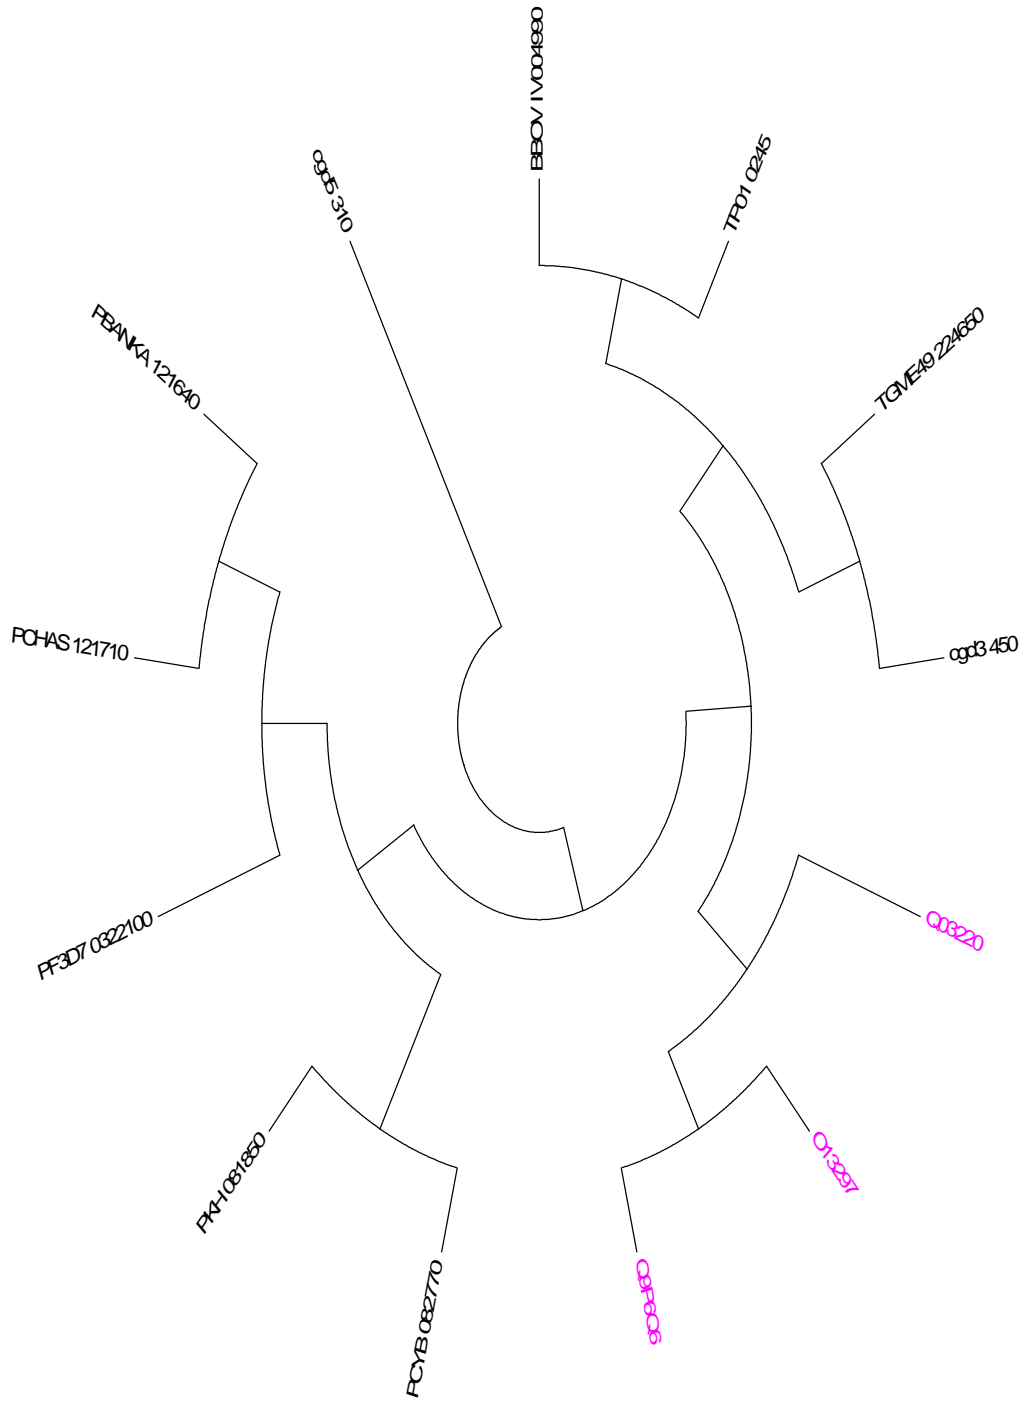

Supplement: 12864_2014_6717_MOESM14_ESM.pdf [file 12864_2014_6717_MOESM14_ESM.pdf]
